# Supplementary material for: Quantifying Patterns of Supraglacial Debris Thickness and Their Glaciological Controls in High Mountain Asia
Source: Frontiers journal article supplement (doi:10.3389/feart.2021.657440), 2021-07-14
Supplement: Data_Sheet_2.DOCX [file Data_Sheet_2.DOCX]

//GLACIER SCALE

//EXAMPLE: BALTORO GLACIER

var ASTERemis = ee.Image("NASA/ASTER_GED/AG100_003"),

ASTERVisParam = {"opacity":1,"bands":["emissivity_band13"],"min":936,"max":991,"palette":[]},

geometry =

/* color: #d63000 */

/* shown: false */

/* displayProperties: [

{

"type": "rectangle"

}

] */

ee.Geometry.Polygon(

[[[86.76149002470473, 28.022213727262105],

[86.76149002470473, 27.961354540750783],

[86.83564773954848, 27.961354540750783],

[86.83564773954848, 28.022213727262105]]], null, false),

geometry2 =

/* color: #98ff00 */

/* shown: false */

/* displayProperties: [

{

"type": "rectangle"

}

] */

ee.Geometry.Polygon(

[[[85.50556365067534, 28.278641189223965],

[85.50556365067534, 28.207868138965274],

[85.57869139725737, 28.207868138965274],

[85.57869139725737, 28.278641189223965]]], null, false),

geometry3 =

/* color: #d63000 */

/* shown: false */

/* displayProperties: [

{

"type": "rectangle"

}

] */

ee.Geometry.Polygon(

[[[86.59315201272315, 28.122967399602608],

[86.59315201272315, 27.908378532417903],

[86.80875870217628, 27.908378532417903],

[86.80875870217628, 28.122967399602608]]], null, false),

geometry4 =

/* color: #98ff00 */

/* shown: false */

/* displayProperties: [

{

"type": "rectangle"

}

] */

ee.Geometry.Polygon(

[[[101.83603115410801, 29.646423129346612],

[101.83603115410801, 29.51564797975601],

[102.09077663750645, 29.51564797975601],

[102.09077663750645, 29.646423129346612]]], null, false),

geometry5 =

/* color: #98ff00 */

/* shown: false */

/* displayProperties: [

{

"type": "rectangle"

}

] */

ee.Geometry.Polygon(

[[[75.85639321293415, 35.965727075086285],

[75.85639321293415, 35.497520221642546],

[76.8808683105904, 35.497520221642546],

[76.8808683105904, 35.965727075086285]]], null, false),

geometry6 =

/* color: #0b4a8b */

/* shown: false */

/* displayProperties: [

{

"type": "rectangle"

}

] */

ee.Geometry.Polygon(

[[[79.19785676869084, 30.862871258718318],

[79.19785676869084, 30.683521912139373],

[79.45603547962834, 30.683521912139373],

[79.45603547962834, 30.862871258718318]]], null, false),

geometry7 =

/* color: #bf04c2 */

/* shown: false */

ee.Geometry.Polygon(

[[[70, 45],

[105, 45],

[105, 25],

[70, 25],

[70, 45]]]),

SouthAsiaEast = ee.FeatureCollection("users/kb621/gamdam20180404_001_SouthAsiaEast"),

SouthAsiaWest = ee.FeatureCollection("users/kb621/gamdam20180404_001_SouthAsiaWest"),

ERA5 = ee.ImageCollection("ECMWF/ERA5/MONTHLY"),

SouthAsiaEast_Scherler = ee.FeatureCollection("users/kb621/15_rgi60_SouthAsiaEast_LS_DC_2013_2017_RATIO"),

SouthAsiaWest_Scherler = ee.FeatureCollection("users/kb621/14_rgi60_SouthAsiaWest_LS_DC_2013_2017_RATIO"),

CentralAsia_Scherler = ee.FeatureCollection("users/kb621/13_rgi60_CentralAsia_LS_DC_2013_2017_RATIO");

// 1. Filter Landsat image collection and composite into a single image

//Get Landsat 8 image collection

var l8 = ee.ImageCollection('LANDSAT/LC08/C01/T1');

var l8visParams = {bands: ['B4', 'B3', 'B2'], max: 30000};

//Filter Landsat 8 image collection by space and time

var l8spatialFiltered = l8.filterBounds(geometry5); // change geometry depending on glacier

var l8temporalFiltered = l8spatialFiltered

.filter(ee.Filter.calendarRange(2013,2015,'year')) // change year range depending on glacier

.filter(ee.Filter.calendarRange(5,10,'month'));

//Filter to find the images with less than 20% cloud cover

var lesscloudy = l8temporalFiltered

.filterMetadata('CLOUD_COVER', 'less_than', 20);

print(lesscloudy, 'less cloudy');

//Set visual parameters

var l8visParams_mean = {bands: ['B4_mean', 'B3_mean', 'B2_mean'], max: 30000};

//Temporally reduce the image collection by taking the mean of the

//middle 60% of pixels of the images with less than 20% cloud cover

var mean_lesscloudy = lesscloudy

.reduce(ee.Reducer.intervalMean(20, 80));

Map.addLayer(mean_lesscloudy, l8visParams_mean, 'Mean of middle 60%');

// 2. Calculate the land surface temperature from the composite thermal band imagery

// Convert the raw data (composite image) to radiance

var radiance_mean = ((mean_lesscloudy.multiply(0.0003342)).add(0.1));

// Convert the raw data to top-of-atmosphere reflectance

var one = radiance_mean.divide(radiance_mean);

var k1constant = one.multiply(774.8853);

var k2constant = one.multiply(1321.0789);

var toa_mean = k2constant.divide(((k1constant.divide(radiance_mean)).add(1)).log());

//Calculation of surface temperature using the single channel

//atmospheric correction algorithm

var ASTERemis13 = ASTERemis.select(['emissivity_band13']);

var ASTERemis14 = ASTERemis.select(['emissivity_band14']);

var ASTERemis_mean = (ASTERemis13.add(ASTERemis14)).divide(2);

var logASTERemis = (ASTERemis_mean.multiply(0.001)).log();

var ASTERemis_mean_final = ASTERemis_mean.multiply(0.001);

var lamda = (toa_mean.multiply(toa_mean)).divide(radiance_mean.multiply(1324));

var delta = toa_mean.subtract((toa_mean.multiply(toa_mean)).divide(1324));

var atmos_trans = one.multiply(0.85); // change atmospheric correction depending on glacier

var LW_up = one.multiply(1.07); // change atmospheric correction depending on glacier

var LW_down = one.multiply(1.81); // change atmospheric correction depending on glacier

var tau1 = one.divide(atmos_trans);

var tau2 = (LW_down.multiply(-1)).subtract(LW_up.divide(atmos_trans));

var tau3 = LW_down;

var LST_mean2 = (((((tau1.multiply(radiance_mean)).add(tau2)).multiply(one.divide(0.94))).add(tau3)).multiply(lamda)).add(delta);

//Map.addLayer(LST_mean2, {bands: ['B10_mean'], min: 250, max: 320, palette: ['5EDAFF', 'FBFF5E', 'FF8989']}, 'LST of mean image 2');

var LST_mean2_C = LST_mean2.subtract(273.15);

Map.addLayer(LST_mean2_C, {bands: ['B10_mean'], min: -10, max: 30, palette: ['5EDAFF', 'FBFF5E', 'FF8989']}, 'LST of mean image 2 degrees C');

// 3. Normalise land surface temperature

//Filter ERA5 Reanalysis data

var ERA5temporalFiltered =

ERA5.filter(ee.Filter.calendarRange(2013,2016,'year'))

.filter(ee.Filter.calendarRange(5,10,'month'));

//Temporally reduce the image collection by taking the mean of the middle 60% of pixels

var mean_ERA5filtered = ERA5temporalFiltered

.reduce(ee.Reducer.intervalMean(20, 80));

var ERA5visParams_mean = {bands: ['mean_2m_air_temperature_mean'],

min:260,max: 320};

//Set visual parameters

var visParams = {bands: ['mean_2m_air_temperature'], min:260,max: 310};

//Map.addLayer(mean_ERA5filtered, ERA5visParams_mean, 'Mean of ERA5');

//Find mean air temperature of HMA region

var meanDictionary = mean_ERA5filtered.reduceRegion({

reducer: ee.Reducer.mean(),

geometry: geometry7,

scale: 30000,

maxPixels: 1e9

});

print('Mean:', meanDictionary.get('mean_2m_air_temperature_mean'));

//Produce a constant array of the mean air temperature

var constant = ee.Number(meanDictionary.get('mean_2m_air_temperature_mean'));

var constant_array = (mean_ERA5filtered.divide(mean_ERA5filtered)).multiply(constant);

//Divide constant array by ERA5 composite image

var multiplier = constant_array.divide(mean_ERA5filtered);

//Multiply surface temperature image by multiplier image tonormalise

var LST_mean_norm_C = LST_mean2_C.multiply(multiplier.select( "mean_2m_air_temperature_mean"));

Map.addLayer(LST_mean_norm_C, {bands: ['B10_mean'], min: -10, max: 30, palette: ['5EDAFF', 'FBFF5E', 'FF8989']}, 'LST of mean image normalised degrees C');

//Clip the calculated LST to the extent of the geometry

var dt_c = LST_mean_norm_C.divide((LST_mean_norm_C.multiply(-0.065)).add(2.086)); // change relationship applied depending on glacier

var dt_c_clippedW = (dt_c.select('B10_mean')).clipToCollection(SouthAsiaWest_Scherler);

var dt_c_clippedE = (dt_c.select('B10_mean')).clipToCollection(SouthAsiaEast_Scherler);

var dt_c_clippedC = (dt_c.select('B10_mean')).clipToCollection(CentralAsia_Scherler);

var dt_c_clipped = ee.ImageCollection([dt_c_clippedW, dt_c_clippedE, dt_c_clippedC]).mosaic();

//var dt_c_clipped = dt_c.clipToCollection(SouthAsiaEast_Scherler);

Map.addLayer(dt_c_clipped, {bands: ['B10_mean'], min: 0, max: 200, palette: ['FF0000', '00FF00', '0000FF']}, 'dt of LST_mean normalised degrees C clipped_rational');
