# Supplementary material for: Quantifying Patterns of Supraglacial Debris Thickness and Their Glaciological Controls in High Mountain Asia
Source: Frontiers journal article supplement (doi:10.3389/feart.2021.657440), 2021-07-14
Supplement: Data_Sheet_3.DOCX [file Data_Sheet_3.DOCX]

//REGIONAL SCALE

var geometry =

/* color: #d63000 */

/* shown: false */

ee.Geometry.Polygon(

[[[70, 25],

[105, 25],

[105, 45],

[70, 45],

[70, 25]]]),

ASTERemis = ee.Image("NASA/ASTER_GED/AG100_003"),

ERA5 = ee.ImageCollection("ECMWF/ERA5/MONTHLY"),

SouthAsiaEast_Scherler = ee.FeatureCollection("users/kb621/15_rgi60_SouthAsiaEast_LS_DC_2013_2017_RATIO"),

SouthAsiaWest_Scherler = ee.FeatureCollection("users/kb621/14_rgi60_SouthAsiaWest_LS_DC_2013_2017_RATIO"),

CentralAsia_Scherler = ee.FeatureCollection("users/kb621/13_rgi60_CentralAsia_LS_DC_2013_2017_RATIO"),

WaterVapour = ee.ImageCollection("NCEP_RE/surface_wv");

// 1. Filter Landsat image collection and composite into a single image

//Get Landsat 8 image collection

var l8 = ee.ImageCollection('LANDSAT/LC08/C01/T1');

var l8visParams = {bands: ['B4', 'B3', 'B2'], max: 30000};

//Filter Landsat 8 image collection by space and time

var l8spatialFiltered = l8.filterBounds(geometry);

var l8temporalFiltered = l8spatialFiltered

.filter(ee.Filter.calendarRange(2013,2016,'year'))

.filter(ee.Filter.calendarRange(5,10,'month'));

//Filter to find the images with less than 20% cloud cover

var lesscloudy = l8temporalFiltered

.filterMetadata('CLOUD_COVER', 'less_than', 20);

print(lesscloudy, 'less cloudy');

//Set visual parameters

var l8visParams_mean = {bands: ['B4_mean', 'B3_mean', 'B2_mean'], max: 30000};

//Temporally reduce the image collection by taking the mean of the

//middle 60% of pixels of the images with less than 20% cloud cover

var mean_lesscloudy = lesscloudy

.reduce(ee.Reducer.intervalMean(20, 80));

Map.addLayer(mean_lesscloudy, l8visParams_mean, 'Mean of middle 60%');

// 2. Calculate the land surface temperature from the composite thermal band imagery;

// Convert the raw data (composite image) to radiance

var radiance_mean = ((mean_lesscloudy.multiply(0.0003342)).add(0.1));

// Convert the raw data to top-of-atmosphere reflectance

var one = radiance_mean.divide(radiance_mean);

var k1constant = one.multiply(774.8853);

var k2constant = one.multiply(1321.0789);

var toa_mean = k2constant.divide(((k1constant.divide(radiance_mean)).add(1)).log());

// EITHER

//Calculation of emissivity corrected land surface temperature

//(using ASTER emissivity product)

var ASTERemis13 = ASTERemis.select(['emissivity_band13']);

var ASTERemis14 = ASTERemis.select(['emissivity_band14']);

var ASTERemis_mean = (ASTERemis13.add(ASTERemis14)).divide(2);

var logASTERemis = (ASTERemis_mean.multiply(0.001)).log();

var logASTERfilled = logASTERemis.unmask((ee.Number(0.94)).log());

var LST_mean = toa_mean.divide(((toa_mean.divide(14388)).multiply(10.8).multiply(logASTERfilled)).add(1));

//Map.addLayer(LST_mean, {bands: ['B10_mean'], min: 250, max: 320, palette: ['5EDAFF', 'FBFF5E', 'FF8989']}, 'LST of mean image');

var LST_mean_C = LST_mean.subtract(273.15);

Map.addLayer(LST_mean_C, {bands: ['B10_mean'], min: -10, max: 30, palette: ['5EDAFF', 'FBFF5E', 'FF8989']}, 'LST of mean image degrees C');

// //OR

// //Calculation of land surface temperature, correcting for the

// //atmosphere using water vapour

// var ASTERemis13 = ASTERemis.select(['emissivity_band13']);

// var ASTERemis14 = ASTERemis.select(['emissivity_band14']);

// var ASTERemis_mean = (ASTERemis13.add(ASTERemis14)).divide(2);

// var ASTERemis_mean_final = ASTERemis_mean.multiply(0.001);

// var ASTERfilled = ASTERemis_mean_final.unmask(ee.Number(0.94));

// var logASTERemis = (ASTERemis_mean.multiply(0.001)).log();

// var logASTERfilled = logASTERemis.unmask((ee.Number(0.94)).log());

// var WaterVapour_spatialFiltered =WaterVapour.filterBounds(geometry);

// var WaterVapour_temporalFiltered = WaterVapour_spatialFiltered

// .filter(ee.Filter.calendarRange(2015,2015,'year'))

// .filter(ee.Filter.calendarRange(5,10,'month'));

// var mean_WaterVapour = WaterVapour_temporalFiltered

// .reduce(ee.Reducer.mean());

// Map.addLayer(mean_WaterVapour, {bands: ['pr_wtr_mean'], min: -10, max: 30, palette: ['5EDAFF', 'FBFF5E', 'FF8989']}, 'water vapour');

// var y = (toa_mean.multiply(toa_mean)).divide( radiance_mean.multiply(1324));var delta =

// toa_mean.subtract((toa_mean.multiply(toa_mean)).divide(1324));

// var w1 = (((mean_WaterVapour.multiply(mean_WaterVapour)).multiply(0.04019)).add(mean_WaterVapour.multiply(0.02916))).add(1.101523);

// var w2 = (((mean_WaterVapour.multiply(mean_WaterVapour)).multiply(-0.38333)).add(mean_WaterVapour.multiply(-1.50294))).add(0.20324);

// var w3 = (((mean_WaterVapour.multiply(mean_WaterVapour)).multiply(0.00918)).add(mean_WaterVapour.multiply(1.36072))).add(-0.27514);

// var LST_mean3 = (((((w1.multiply(radiance_mean)).add(w2)).multiply(one.divide(ASTERfilled))).add(w3)).multiply(y)).add(delta);

// Map.addLayer(LST_mean3, {bands: ['B10_mean'], min: 250, max: 320, palette: ['5EDAFF', 'FBFF5E', 'FF8989']}, 'LST of mean image 3');

// var LST_mean3_C = LST_mean3.subtract(273.15);

// Map.addLayer(LST_mean3_C, {bands: ['B10_mean'], min: -10, max: 30, palette: ['5EDAFF', 'FBFF5E', 'FF8989']}, 'LST of mean image 3 degrees C');

// 3. Normalise the land surface temperature

//Filter ERA5 Reanalysis data

var ERA5temporalFiltered =

ERA5.filter(ee.Filter.calendarRange(2013,2016,'year'))

.filter(ee.Filter.calendarRange(5,10,'month'));

//Temporally reduce the image collection by taking the mean of the

//middle 60% of pixels

var mean_ERA5filtered = ERA5temporalFiltered

.reduce(ee.Reducer.intervalMean(20, 80));

var ERA5visParams_mean = {bands: ['mean_2m_air_temperature_mean'],

min:260,max: 320};

//Set visual parameters

var visParams = {bands: ['mean_2m_air_temperature'], min:260,max: 310};

//Map.addLayer(mean_ERA5filtered, ERA5visParams_mean, 'Mean of ERA5');

//Find mean air temperature of HMA region

var meanDictionary = mean_ERA5filtered.reduceRegion({

reducer: ee.Reducer.mean(),

geometry: geometry,

scale: 30000,

maxPixels: 1e9

});

print('Mean:', meanDictionary.get('mean_2m_air_temperature_mean'));

//Produce a constant array of the mean air temperature

var constant = ee.Number(meanDictionary.get( 'mean_2m_air_temperature_mean'));

var constant_array = (mean_ERA5filtered.divide(mean_ERA5filtered)).multiply(constant);

//Divide constant array by ERA5 composite image

var multiplier = constant_array.divide(mean_ERA5filtered);

//Multiply surface temperature image by multiplier image to normalise

var LST_mean_norm_C = LST_mean_C.multiply(multiplier.select("mean_2m_air_temperature_mean"));

Map.addLayer(LST_mean_norm_C, {bands: ['B10_mean'], min: -10, max: 30, palette: ['5EDAFF', 'FBFF5E', 'FF8989']}, 'LST of mean image normalised degrees C');

// 4. Apply regional rational curve debris thickness/surface temperature relationship to regional surface temp calculation

//Apply empirically derived relationship to the regionally calculated land surface temperature

var dt_c = LST_mean_norm_C.divide((LST_mean_norm_C.multiply(-0.0198)).add(0.558));

var dt_c_clippedW = (dt_c.select('B10_mean')).clipToCollection(SouthAsiaWest_Scherler);

var dt_c_clippedE = (dt_c.select('B10_mean')).clipToCollection(SouthAsiaEast_Scherler);

var dt_c_clippedC = (dt_c.select('B10_mean')).clipToCollection(CentralAsia_Scherler);

var dt_c_clipped = ee.ImageCollection([dt_c_clippedW, dt_c_clippedE, dt_c_clippedC]).mosaic();

Map.addLayer(dt_c_clipped, {bands: ['B10_mean'], min: 0, max: 200, palette: ['FF0000', '00FF00', '0000FF']}, 'dt of LST_mean normalised degrees C clipped');
